# Supplementary material for: Cardiopulmonary Resuscitation Training in Schools Following 8 Years of Mandating Legislation in Denmark: A Nationwide Survey
Source: PubMed Central journal article supplement — J Am Heart Assoc. 2017 Mar 14;6(3):e004128. doi: 10.1161/JAHA.116.004128 (PMC5523990; doi:10.1161/jaha.116.004128), 2017-03-14
Supplement: JAH3-6-e004128-s001.pdf [file JAH3-6-e004128-s001.pdf]

# **Supplemental Material**

**Table S1.** All variables included in univariable analysis of the association between completed CPR training and factors associated with completed CPR training

| <b>Predictor from TPB</b> | <b>Variable</b>                                                             |
|---------------------------|-----------------------------------------------------------------------------|
| <b>Knowledge</b>          | Is CPR training of students mandatory before graduation from Middle school? |
| <b>Background</b>         | <b>Respondents (teachers)</b>                                               |
|                           | Sex                                                                         |
|                           | Age                                                                         |
|                           | Years working in a school                                                   |
|                           | Family member, friend or acquaintance with previous cardiac arrest          |
|                           | Had thought about CPR training of students prior to this survey             |
|                           | Had provided first-aid in life-threatening situation prior to this survey   |
|                           | Had taken a first-aid course prior to this survey                           |
|                           | Had taken a first-aid course within the last 2 years                        |
|                           | <b>School</b>                                                               |
|                           | AED present                                                                 |
|                           | Median number of students                                                   |
|                           | Distance (km) to nearest hospital                                           |
|                           | Presence of a staff member who is very passionate about CPR training        |
|                           | School leadership has reported CPR training is mandatory                    |

|                                                             |                                                                   |                                                                                                                   |
|-------------------------------------------------------------|-------------------------------------------------------------------|-------------------------------------------------------------------------------------------------------------------|
|                                                             |                                                                   | School leadership has reported CPR training should be mandatory                                                   |
| <b>Teachers' attitudes towards CPR training of students</b> |                                                                   |                                                                                                                   |
| <b>Direct measure</b>                                       |                                                                   | CPR training should be mandatory                                                                                  |
| <b>Indirect measures</b>                                    | Behavioral Beliefs                                                | CPR training provides skills to perform CPR                                                                       |
|                                                             |                                                                   | CPR training diminishes fear when facing emergency situations                                                     |
|                                                             |                                                                   | CPR training empowers students to take action in emergency situations                                             |
|                                                             |                                                                   | CPR training makes students capable of saving lives                                                               |
|                                                             |                                                                   | CPR training encourages students to take more responsibility (care more) for others                               |
|                                                             |                                                                   | CPR training increases students' understanding of being a citizen                                                 |
|                                                             |                                                                   | CPR training of students will increase bystander CPR on the long-term                                             |
|                                                             |                                                                   | Students find CPR training uncomfortable/scary                                                                    |
|                                                             | Evaluation of behavioral beliefs                                  | Is it important for you as a teacher, that students acquire skills to provide CPR?                                |
|                                                             |                                                                   | Is it important for you as a teacher, that students take action when facing emergency situations?                 |
|                                                             |                                                                   | Is it important for you as a teacher, that students are able to save lives?                                       |
|                                                             |                                                                   | Is it important for you as a teacher, that more people perform CPR on the long-term?                              |
|                                                             | <b>Measure of pressure teachers feel to train students in CPR</b> |                                                                                                                   |
| <b>Direct measure</b>                                       |                                                                   | To what degree is it expected from you, as a teacher at your school, that students are trained in CPR?            |
| <b>Indirect</b>                                             | Normative beliefs -                                               | During the past 3 years, how many of graduating classes (Middle school) do you think have completed CPR training? |

|                                                             |                                      |                                                                                          |
|-------------------------------------------------------------|--------------------------------------|------------------------------------------------------------------------------------------|
| <b>measures</b>                                             | Descriptive norm                     | How many Middle schools do you think have implemented CPR training?                      |
|                                                             | Normative beliefs - injunctive norms | <b>The following groups think/express that students should be trained in CPR</b>         |
|                                                             |                                      | Students/the student council                                                             |
|                                                             |                                      | Parents/Parents' committee                                                               |
|                                                             |                                      | Teachers                                                                                 |
|                                                             |                                      | School leadership                                                                        |
|                                                             |                                      | The teachers' union                                                                      |
|                                                             |                                      | The county administration                                                                |
|                                                             |                                      | The ministry for Children and Education                                                  |
|                                                             | Motivation by comply                 | <b>How much do the following groups generally influence your decisions as a teacher?</b> |
|                                                             |                                      | Students/the student council                                                             |
|                                                             |                                      | Parents/Parents' committee                                                               |
|                                                             |                                      | Teachers                                                                                 |
|                                                             |                                      | School leadership                                                                        |
|                                                             |                                      | Teachers' union                                                                          |
| The county administration                                   |                                      |                                                                                          |
| The Ministry for Children and Education                     |                                      |                                                                                          |
| <b>Teachers' perceived ability to train students in CPR</b> |                                      |                                                                                          |

|                          |                                                                                              |                                                                                                                 |
|--------------------------|----------------------------------------------------------------------------------------------|-----------------------------------------------------------------------------------------------------------------|
| <b>Direct measure</b>    |                                                                                              | <b>None</b>                                                                                                     |
| <b>Indirect measures</b> | Control beliefs                                                                              | Is there a CPR training coordinator at your school?                                                             |
|                          |                                                                                              | What expenses do you think are associated with acquiring CPR training material (f.ex. Manikins)?                |
|                          |                                                                                              | What expenses do you think are associated with training teachers to conduct CPR training of students?           |
|                          |                                                                                              | What expenses do you think are associated with hiring external instructors to conduct CPR training of students? |
|                          |                                                                                              | How many periods do you think it is necessary to train students in CPR?                                         |
|                          |                                                                                              | At the moment, do you feel you have the skills to train students in CPR?                                        |
|                          |                                                                                              | At the moment, would you be interested in training students in CPR?                                             |
|                          |                                                                                              | CPR training fits well into the curriculum (f.ex. Biology or gym class)                                         |
|                          |                                                                                              | The school provides clear guidelines as to who is responsible for CPR training is conducted                     |
|                          |                                                                                              | I think it is easy to acquire good CPR training material                                                        |
|                          |                                                                                              | Perceived power                                                                                                 |
|                          | The presence of a CPR training coordinator                                                   |                                                                                                                 |
|                          | The expenses associated with acquiring CPR training material (f.ex. Manikins)                |                                                                                                                 |
|                          | The expenses associated with training teachers to conduct CPR training of students           |                                                                                                                 |
|                          | The expenses associated with hiring external instructors to conduct CPR training of students |                                                                                                                 |
|                          | The time required to complete the training                                                   |                                                                                                                 |

|  |  |                                                                         |
|--|--|-------------------------------------------------------------------------|
|  |  | Other teachers' skills to conduct CPR training                          |
|  |  | Own skills to conduct CPR training                                      |
|  |  | CPR training fits well into the curriculum                              |
|  |  | Clear guidelines as to who is responsible for CPR training is conducted |
|  |  | Availability of CPR training material                                   |

**Table S2.** Construction of latent variables of teachers' attitudes towards CPR training, perceived pressure and perceived behavioral control to ensure student CPR training

|                                                                                                                                                                            |                                                                                                       |
|----------------------------------------------------------------------------------------------------------------------------------------------------------------------------|-------------------------------------------------------------------------------------------------------|
| <b>Total score for teachers' attitudes towards CPR training of students= (1a x 1b) + (2a x 2b) + (3a x 3b) + (4a x 4b) + (5a x 5b) + (6a x 6b) + (7a x 7b) + (8a x 8b)</b> |                                                                                                       |
| Indirect measures of teachers' attitudes towards CPR training of students: behavioral beliefs                                                                              | Evaluation of behavioral beliefs regarding CPR training of student                                    |
| 1a- CPR training provides skills to perform CPR                                                                                                                            | 1b- Is it important for you as a teacher, that students acquire skills to provide CPR?                |
| 2a- CPR training diminishes fear when facing emergency situations                                                                                                          | 2b- score 5 for all                                                                                   |
| 3a- CPR training empowers students to take action in emergency situations                                                                                                  | 3b- Is it important for you as a teacher, that students take action when facing emergency situations? |
| 4a- CPR training makes students capable of saving lives                                                                                                                    | 4b- Is it important for you as a teacher, that students are able to save lives?                       |
| 5a- CPR training encourages students to take more responsibility (care more) for others                                                                                    | 5b- score 5 for all                                                                                   |
| 6a- CPR training increases students' understanding of being a citizen                                                                                                      | 6b- score 5 for all                                                                                   |
| 7a- CPR training of students will increase bystander CPR on the long-term                                                                                                  | 7b- Is it important for you as a teacher, that more people perform CPR on the long-term?              |
| 8a- Students find CPR training uncomfortable/scary*                                                                                                                        | 8b - score 5 for all*                                                                                 |

|                                                                                                                                                                                                                            |                                                                                  |
|----------------------------------------------------------------------------------------------------------------------------------------------------------------------------------------------------------------------------|----------------------------------------------------------------------------------|
| <p><b>Total score for how much pressure teachers feel to ensure students complete CPR training= (1a x 1b) + (2ax 2b) + (3a x 3b) + (4a x 4b) + (5a x 5b) + (6a x 6b) + (7a x 7b)</b></p>                                   |                                                                                  |
| Indirect Measures of measures of pressure teachers feel to train students in CPR: subjective norms                                                                                                                         | Teachers' Motivation to comply                                                   |
| The following groups think/express that students should be trained in CPR                                                                                                                                                  | How much do the following groups generally influence your decisions as a teacher |
| 1a- Students/the student council                                                                                                                                                                                           | 1b- Students/the student council                                                 |
| 2a- Parents/Parents' committee                                                                                                                                                                                             | 2b-Parents/Parents' committee                                                    |
| 3a-Teachers                                                                                                                                                                                                                | 3b-Teachers                                                                      |
| 4a- The school leadership                                                                                                                                                                                                  | 4b-The school leadership                                                         |
| 5a-The teachers' union                                                                                                                                                                                                     | 5b-The teachers' union                                                           |
| 6a- The county administration                                                                                                                                                                                              | 6b-The county administration                                                     |
| 7a -The ministry for Children and Education                                                                                                                                                                                | 7b-The Ministry for Children and Education                                       |
| <p><b>Total score for Teachers' Perceived Behavioral Control over CPR Training of Students= (1a x 1b) + (2ax 2b) + (3a x 3b) + (4a x 4b) + (5a x 5b) + (6a x 6b) + (7a x 7b) + (8a x 8b) + (9a x 9b) + (10a x 10b)</b></p> |                                                                                  |
| Indirect measures of teachers' perceived behavioral control over CPR training of students: control beliefs                                                                                                                 | Perceived Power to Conduct CPR training of students                              |



|                                                                                                                     |                                                                                                   |
|---------------------------------------------------------------------------------------------------------------------|---------------------------------------------------------------------------------------------------|
|                                                                                                                     | In your opinion, how much do the following factors influence whether CPR training is conducted?   |
| 1a- Is there a CPR training coordinator at your school?*                                                            | 1b- The presence of a CPR training coordinator.*                                                  |
| 2a- What expenses do you think are associated with acquiring CPR training material (f.ex. Manikins)?                | 2b- The expenses associated with acquiring CPR training material (f.ex. Manikins).                |
| 3a- What expenses do you think are associated with training teachers to conduct CPR training of students?           | 3b- The expenses associated with training teachers to conduct CPR training of students.           |
| 4a- What expenses do you think are associated with hiring external instructors to conduct CPR training of students? | 4b- The expenses associated with hiring external instructors to conduct CPR training of students. |
| 5a- How many periods do you think are necessary to train students in CPR?                                           | 5b- The time required to complete the training.                                                   |
| 6a- At the moment, do you feel you have the skills to train students in CPR?*                                       | 6b- score 5 for all*                                                                              |
| 7a- At the moment, would you be interested in training students in CPR?*                                            | 7b- Other teachers' skills to conduct CPR training.*                                              |
| 8a- CPR training fits well into the curriculum (f.ex. Biology or gym class).*                                       | 8b- CPR training fits well into the curriculum.*                                                  |

|                                                                                                |                                                                            |
|------------------------------------------------------------------------------------------------|----------------------------------------------------------------------------|
| 9a-The school provides clear guidelines as to who is responsible for CPR training is conducted | 9b-Clear guidelines as to who is responsible for CPR training is conducted |
| 10a- I think it is easy to acquire good CPR training material.*                                | 10b- Availability of CPR training material.*                               |

\*Indicates items which were excluded from the final logistic regression model for attitudes, subjective norms and perceived behavioral control due to a low correlation coefficient in scale validation.

In cases which the evaluation of a predictor variable was redundant (according to participants in the pilot test), scores were automatically set to 5.

**Table S3.** Definition of latent variables

| Indirect measure                                                          | TPB Domain                       | Variable from questionnaire survey                                                  | Item                                                                                              | Definition of scale                                                                                                                                                                       |    |
|---------------------------------------------------------------------------|----------------------------------|-------------------------------------------------------------------------------------|---------------------------------------------------------------------------------------------------|-------------------------------------------------------------------------------------------------------------------------------------------------------------------------------------------|----|
| Indirect measures of teachers' attitudes towards CPR training of students | Behavioral beliefs               | CPR training provides skills to perform CPR                                         | A1                                                                                                | Definition of scale<br>$ATT = \sum_{i=1}^8 X_i$ where<br>$X_i$ is item product<br>$X_i = A_i \cdot (B_i - 3)$<br>$B_i = 5$ for $i = 2, 5, 6, 8$<br>Range of scale:<br>$ATT \in [-80; 80]$ |    |
|                                                                           |                                  | CPR training lessens fear when facing emergency situations                          | A2                                                                                                |                                                                                                                                                                                           |    |
|                                                                           |                                  | CPR training empowers students to take action in emergency situations               | A3                                                                                                |                                                                                                                                                                                           |    |
|                                                                           |                                  | CPR training makes students capable of saving lives                                 | A4                                                                                                |                                                                                                                                                                                           |    |
|                                                                           |                                  | CPR training encourages students to take more responsibility (care more) for others | A5                                                                                                |                                                                                                                                                                                           |    |
|                                                                           |                                  | CPR training increases students' understanding of being a citizen                   | A6                                                                                                |                                                                                                                                                                                           |    |
|                                                                           |                                  | CPR training of students will increase bystander CPR on the long-term               | A7                                                                                                |                                                                                                                                                                                           |    |
|                                                                           |                                  | Students find CPR training uncomfortable/scary                                      | A8                                                                                                |                                                                                                                                                                                           |    |
|                                                                           | Evaluation of behavioral beliefs | Is it important for you as a teacher, that students acquire skills to provide CPR?  |                                                                                                   |                                                                                                                                                                                           | B1 |
|                                                                           |                                  |                                                                                     | Is it important for you as a teacher, that students take action when facing emergency situations? |                                                                                                                                                                                           | B3 |
|                                                                           |                                  |                                                                                     | Is it important for you as a teacher, that students are able to save lives?                       |                                                                                                                                                                                           | B4 |

|                                                                      |                                      |                                                                                                                   |                                                                                         |                                                                                                                                                            |
|----------------------------------------------------------------------|--------------------------------------|-------------------------------------------------------------------------------------------------------------------|-----------------------------------------------------------------------------------------|------------------------------------------------------------------------------------------------------------------------------------------------------------|
|                                                                      |                                      | Is it important for you as a teacher, that more people perform CPR on the long-term?                              | B7                                                                                      |                                                                                                                                                            |
| Indirect measures of pressure teachers feel to train students in CPR | Normative beliefs - Descriptive norm | During the past 3 years, how many of graduating classes (Middle school) do you think have completed CPR training? | C1                                                                                      | Definition of scale<br>$SND = \sum_{i=1}^2 C_i / 2$<br>Range of scale:<br>$SND \in [0; 10]$                                                                |
|                                                                      |                                      | How many Middle schools do you think have implemented CPR training?                                               | C2                                                                                      |                                                                                                                                                            |
|                                                                      | Normative beliefs - injunctive norms | <b>The following groups think/express that students should be trained in CPR</b>                                  |                                                                                         |                                                                                                                                                            |
|                                                                      |                                      | Students/the student council                                                                                      | D1                                                                                      | Definition of scale<br>$SNI = \sum_{i=1}^7 Y_i$<br>where<br>$Y_i$ is item product<br>$Y_i = D_i \cdot (E_i - 3)$<br>Range of scale:<br>$SNI \in [-70; 70]$ |
|                                                                      |                                      | Parents/Parents' committee                                                                                        | D2                                                                                      |                                                                                                                                                            |
|                                                                      |                                      | Teachers                                                                                                          | D3                                                                                      |                                                                                                                                                            |
|                                                                      |                                      | The school leadership                                                                                             | D4                                                                                      |                                                                                                                                                            |
|                                                                      |                                      | The teachers' union                                                                                               | D5                                                                                      |                                                                                                                                                            |
|                                                                      |                                      | The county administration                                                                                         | D6                                                                                      |                                                                                                                                                            |
|                                                                      |                                      | The ministry for Children and Education                                                                           | D7                                                                                      |                                                                                                                                                            |
|                                                                      |                                      | Motivation by comply                                                                                              | <b>How much do the following groups generally influence your decisions as a teacher</b> |                                                                                                                                                            |
| Students/the student council                                         | E1                                   |                                                                                                                   |                                                                                         |                                                                                                                                                            |
| Parents/Parents' committee                                           | E2                                   |                                                                                                                   |                                                                                         |                                                                                                                                                            |

|                                                                          |                 |                                                                                                                 |    |                                                                                                                                                                                                       |
|--------------------------------------------------------------------------|-----------------|-----------------------------------------------------------------------------------------------------------------|----|-------------------------------------------------------------------------------------------------------------------------------------------------------------------------------------------------------|
|                                                                          |                 | Teachers                                                                                                        | E3 |                                                                                                                                                                                                       |
|                                                                          |                 | The school leadership                                                                                           | E4 |                                                                                                                                                                                                       |
|                                                                          |                 | B40e The teachers' union                                                                                        | E5 |                                                                                                                                                                                                       |
|                                                                          |                 | The county administration                                                                                       | E6 |                                                                                                                                                                                                       |
|                                                                          |                 | The Ministry for Children and Education                                                                         | E7 |                                                                                                                                                                                                       |
| Indirect measure of teachers' perceived ability to train students in CPR | Control beliefs | Is there a CPR training coordinator at your school?                                                             | F1 | <p>Definition of scale</p> $PBC = \sum_{i=1}^{10} Z_i$ <p>where</p> $Z_i \text{ is item product}$ $Z_i = F_i \cdot (G_i - 3)$ $G_i = 5 \text{ for } i=7$ <p>Range of scale:</p> $PBC \in [-100; 100]$ |
|                                                                          |                 | What expenses do you think are associated with acquiring CPR training material (f.ex. Manikins)?                | F2 |                                                                                                                                                                                                       |
|                                                                          |                 | What expenses do you think are associated with training teachers to conduct CPR training of students?           | F3 |                                                                                                                                                                                                       |
|                                                                          |                 | What expenses do you think are associated with hiring external instructors to conduct CPR training of students? | F4 |                                                                                                                                                                                                       |
|                                                                          |                 | How many hours do you think it is necessary to train students in CPR?                                           | F5 |                                                                                                                                                                                                       |
|                                                                          |                 | At the moment, do you feel you have the skills to train students in CPR?                                        | F6 |                                                                                                                                                                                                       |
|                                                                          |                 | At the moment, would you be interested in training students in CPR?                                             | F7 |                                                                                                                                                                                                       |
|                                                                          |                 | CPR training fits well into the curriculum (f.ex. Biology or gym class)                                         | F8 |                                                                                                                                                                                                       |

|                 |                                                                                                        |                                                                                              |     |
|-----------------|--------------------------------------------------------------------------------------------------------|----------------------------------------------------------------------------------------------|-----|
|                 |                                                                                                        | The school provides clear guidelines as to who is responsible for CPR training is conducted  | F9  |
|                 |                                                                                                        | B34c I think it is easy to acquire good CPR training material                                | F10 |
| Perceived power | <b>In your opinion, how much do the following factors influence whether CPR training is conducted?</b> |                                                                                              |     |
|                 |                                                                                                        | The presence of a CPR training coordinator                                                   | G1  |
|                 |                                                                                                        | The expenses associated with acquiring CPR training material (f.ex. Manikins)                | G2  |
|                 |                                                                                                        | The expenses associated with training teachers to conduct CPR training of students           | G3  |
|                 |                                                                                                        | The expenses associated with hiring external instructors to conduct CPR training of students | G4  |
|                 |                                                                                                        | The time required to complete the training                                                   | G5  |
|                 |                                                                                                        | Other teachers' skills to conduct CPR training                                               | G6  |
|                 |                                                                                                        | Own skills to conduct CPR training                                                           | G7  |
|                 |                                                                                                        | CPR training fits well into the curriculum                                                   | G8  |
|                 |                                                                                                        | Clear guidelines as to who is responsible for CPR training is conducted                      | G9  |
|                 | Availability of CPR training material                                                                  | G10                                                                                          |     |

**Table S4.** Descriptive analysis, univariable analysis and differential item functioning for CPR training and each latent variable

| Latent variable                                             | Measure | Item product code# | Homeroom class has received CPR training in 6th-9th grade |              |              |                 |            |         | DIF <sup>§</sup>       |
|-------------------------------------------------------------|---------|--------------------|-----------------------------------------------------------|--------------|--------------|-----------------|------------|---------|------------------------|
|                                                             |         |                    | Total                                                     | Yes          | No           | OR <sup>§</sup> | 95% CI     | P value |                        |
|                                                             |         |                    | N                                                         | Median (IQR) | Median (IQR) |                 |            |         |                        |
| <b>Teachers' attitudes towards CPR training of students</b> |         |                    |                                                           |              |              |                 |            |         |                        |
| Direct                                                      |         | Adir               | 624                                                       | 5 (5; 5)     | 5 (5; 5)     | 3.12            | 1.52; 6.42 | 0.002   | NA                     |
| Indirect                                                    |         | X1                 | 620                                                       | 4 (3; 8)     | 4 (3; 6)     | 1.09            | 1.03; 1.15 | 0.002   | nonuniform DIF (0.037) |
|                                                             |         | X2                 | 626                                                       | 8 (6; 8)     | 8 (6; 8)     | 1.06            | 0.95; 1.18 | 0.29    | no DIF                 |
|                                                             |         | X3                 | 616                                                       | 6 (4; 8)     | 4 (3; 8)     | 1.14            | 1.07; 1.21 | <0.001  | nonuniform DIF (0.048) |
|                                                             |         | X4                 | 620                                                       | 5 (3; 8)     | 4 (3; 8)     | 1.04            | 0.98; 1.10 | 0.21    | no DIF                 |
|                                                             |         | X5                 | 623                                                       | 8 (6; 8)     | 8 (6; 8)     | 1.13            | 1.01; 1.27 | 0.034   | no DIF                 |

|                                                        |                     |      |     |            |           |      |               |        |        |
|--------------------------------------------------------|---------------------|------|-----|------------|-----------|------|---------------|--------|--------|
|                                                        |                     | X6   | 621 | 8 (6; 8)   | 8 (6; 8)  | 1.14 | 1.02;<br>1.26 | 0.017  | no DIF |
|                                                        |                     | X7   | 612 | 8 (4; 8)   | 6 (4; 8)  | 1.05 | 0.99;<br>1.12 | 0.09   | no DIF |
|                                                        |                     | X8   | 621 | 8 (8; 10)  | 8 (6; 10) | 1.27 | 1.15;<br>1.41 | <0.001 | no DIF |
| <b>Pressure teachers feel to train students in CPR</b> |                     |      |     |            |           |      |               |        |        |
| Direct                                                 | Subjective<br>norm  | Sdir | 618 | 2 (2; 3)   | 2 (1; 2)  | 1.88 | 1.56;<br>2.27 | <0.001 | NA     |
| Indirect                                               | Descriptive<br>norm | C1   | 636 | 2 (1.5; 4) | 4 (4; 5)  | 0.32 | 0.26;<br>0.38 | <0.001 | NA     |
|                                                        |                     | C2   | 617 | 4 (3; 5)   | 5 (4; 5)  | 0.38 | 0.31;<br>0.47 | <0.001 | NA     |
| Indirect                                               | Injunctive<br>norm  | Y1   | 589 | 0 (-1; 2)  | 0 (-1; 0) | 1.06 | 0.97;<br>1.16 | 0.21   | no DIF |
|                                                        |                     | Y2   | 589 | 0 (0; 2)   | 0 (0; 2)  | 0.98 | 0.90;<br>1.07 | 0.68   | no DIF |
|                                                        |                     | Y3   | 592 | 3 (0; 4)   | 2 (0; 3)  | 1.12 | 1.03;<br>1.21 | 0.005  | no DIF |
|                                                        |                     | Y4   | 593 | 3 (2; 4)   | 2 (2; 4)  | 1.08 | 1.00;<br>1.16 | 0.038  | no DIF |



|  |  |    |     |           |           |      |               |       |        |
|--|--|----|-----|-----------|-----------|------|---------------|-------|--------|
|  |  | Y5 | 588 | 0 (-2; 0) | 0 (-2; 0) | 0.96 | 0.88;<br>1.05 | 0.39  | no DIF |
|  |  | Y6 | 592 | 0 (-2; 1) | 0 (-1; 2) | 0.91 | 0.84;<br>0.98 | 0.019 | no DIF |
|  |  | Y7 | 588 | 0 (0; 3)  | 0 (0; 2)  | 0.96 | 0.90;<br>1.03 | 0.25  |        |

**Indirect measure of teachers' perceived ability to train students in CPR**

|          |                 |    |     |          |           |      |               |        |                        |
|----------|-----------------|----|-----|----------|-----------|------|---------------|--------|------------------------|
| Indirect | Control beliefs | Z1 | 632 | 5 (1; 5) | 5 (5; 10) | 0.92 | 0.88;<br>0.96 | <0.001 | no DIF                 |
|          |                 | Z2 | 621 | 1 (0; 3) | 2 (0; 4)  | 0.96 | 0.90;<br>1.02 | 0.16   | no DIF                 |
|          |                 | Z3 | 623 | 1 (0; 4) | 2 (0; 4)  | 0.98 | 0.93;<br>1.03 | 0.43   | no DIF                 |
|          |                 | Z4 | 620 | 1 (0; 4) | 2 (0; 4)  | 0.97 | 0.92;<br>1.02 | 0.28   | no DIF                 |
|          |                 | Z5 | 629 | 0 (0; 3) | 0 (0; 3)  | 0.96 | 0.91;<br>1.01 | 0.14   | no DIF                 |
|          |                 | Z6 | 631 | 2 (0; 4) | 2 (0; 3)  | 1.02 | 0.95;<br>1.10 | 0.58   | no DIF                 |
|          |                 | Z7 | 641 | 6 (4; 8) | 6 (4; 8)  | 1.03 | 0.95;<br>1.10 | 0.50   | uniform DIF<br>(0.020) |

|  |  |     |     |          |          |      |               |       |        |
|--|--|-----|-----|----------|----------|------|---------------|-------|--------|
|  |  | Z8  | 630 | 0 (0; 5) | 0 (0; 4) | 0.97 | 0.93;<br>1.91 | 0.19  | no DIF |
|  |  | Z9  | 627 | 2 (0; 4) | 2 (1; 4) | 1.00 | 0.94;<br>1.07 | 0.96  | no DIF |
|  |  | Z10 | 630 | 4 (0; 5) | 3 (0; 4) | 1.07 | 1.02;<br>1.13 | 0.009 | no DIF |

Abbreviations: CI, confidence interval; CPR, cardiopulmonary resuscitation; DIF, differential item

functioning; IQR, interquartile range; NA, Not applicable; OR, odds ratio.

#See Table S3 for a definition of item product code.

\$OR is given for a change in item product of one unit, each item product range from -10 to 10

‡Differential Item Functioning (DIF) presented as no DIF, uniform DIF and nonuniform DIF (P value of test)

**Table S5.** Association between Domains in the Theory of Planned Behavior and Completed CPR training

| <b>Domains in Survey of Teachers</b>                                      | <b>TPB Domains</b>                                    | <b>OR (95%CI)</b>    | <b>P value</b> | <b>Chronbach's Alfa</b> |
|---------------------------------------------------------------------------|-------------------------------------------------------|----------------------|----------------|-------------------------|
| Direct measure of teachers' attitudes towards CPR training of students    | Attitude - direct measure                             | 3.12<br>(1.52; 6.42) | 0.002          | -                       |
| Indirect measures of teachers' attitudes towards CPR training of students | Attitude - indirect measure                           | 1.02<br>(1.01; 1.04) | <0.001         | 0.89                    |
| Direct measure of pressure teachers feel to train students in CPR         | Subjective norm - direct measure                      | 1.88<br>(1.56; 2.27) | <0.001         | -                       |
| Indirect measures of pressure teachers feel to train students in CPR      | Subjective norm - descriptive norm - indirect measure | 5.24<br>(3.96; 6.95) | <0.001         | 0.79                    |
|                                                                           | Subjective norm - injunctive norm - indirect measure  | 1.01<br>(0.99; 1.02) | 0.56           |                         |
| Indirect measure of teachers' perceived ability to train students in CPR  | Perceived behavioral control                          | 0.99<br>(0.98; 1.00) | 0.22           | 0.89                    |

Abbreviations: CI, confidence interval; CPR, cardiopulmonary resuscitation; TPB, Theory of Planned Behavior; OR, odds ratio.

**Table S6.** Characteristics of Non-Respondents

| Characteristic                                                  | Teachers (n=1381)   |                         |         | School Leadership members (n=1240) |                         |         |
|-----------------------------------------------------------------|---------------------|-------------------------|---------|------------------------------------|-------------------------|---------|
|                                                                 | Respondents (n=665) | Non-respondents (n=716) | p value | Respondents (n=611)                | Non-respondents (n=629) | p value |
| Region, % (n)                                                   |                     |                         | 0.020   |                                    |                         | 0.88    |
| Copenhagen and Capital Region of Denmark                        | 50.1 (202)          | 49.9 (201)              |         | 50.6 (175)                         | 49.4 (171)              |         |
| Zealand                                                         | 37.1 (72)           | 62.9 (122)              |         | 48.0 (98)                          | 52.0 (106)              |         |
| Southern Region                                                 | 48.2 (144)          | 51.8 (155)              |         | 51.1 (138)                         | 48.9 (132)              |         |
| Central Region                                                  | 51.5 (173)          | 48.5 (163)              |         | 47.5 (135)                         | 52.5 (149)              |         |
| Northern Region                                                 | 50.3 (75)           | 49.7 (74)               |         | 47.8 (65)                          | 52.2 (71)               |         |
| Number of 9th grade students in the school, median (25th, 75th) | 58 (40, 76)         | 55 (39, 73)             | 0.13    | 41 (22, 59)                        | 46 (31, 63)             | <0.001  |
| Number of 9th grade classes in the school, median (25th, 75th)  | 3 (2, 4)            | 3 (2, 4)                | 0.87    | 2 (1, 3)                           | 2 (2,3)                 | 0.004   |
| Type of school                                                  |                     |                         | 0.027   |                                    |                         | <0.001  |
| Private schools, % (n)                                          | 41.7 (100)          | 58.3 (140)              |         | 59.8 (205)                         | 40.2 (138)              |         |
| Public schools, % (n)                                           | 49.5 (565)          | 50.5 (576)              |         | 45.3 (406)                         | 54.7 (491)              |         |

**Figure S1.** Confirmatory Factor Analysis

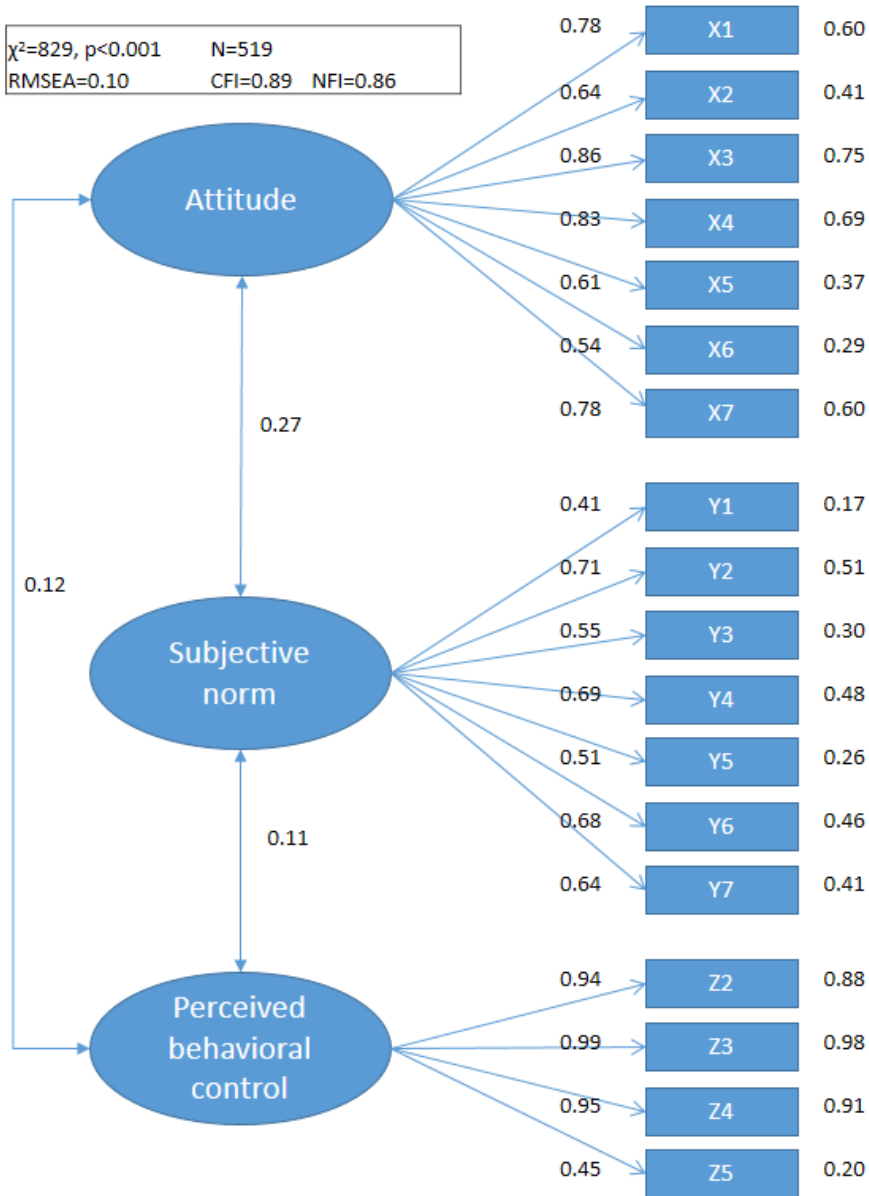

The coefficient associated with the two-headed arrow is the correlation between the latent variables. The coefficient associated with arrows leading from the latent variables to the item products show the factor loadings for each item product. The coefficients to the right of the item products are the percent of the variance for the item product that could be explained by the latent variable.
